# Supplementary material for: Dopaminergic Projections from the Hypothalamic A11 Nucleus to the Spinal Trigeminal Nucleus Are Involved in Bidirectional Migraine Modulation
Source: MDPI journal article supplement (doi:10.3390/ijms242316876), 2023-11-28
Supplement: s1 [file s1]

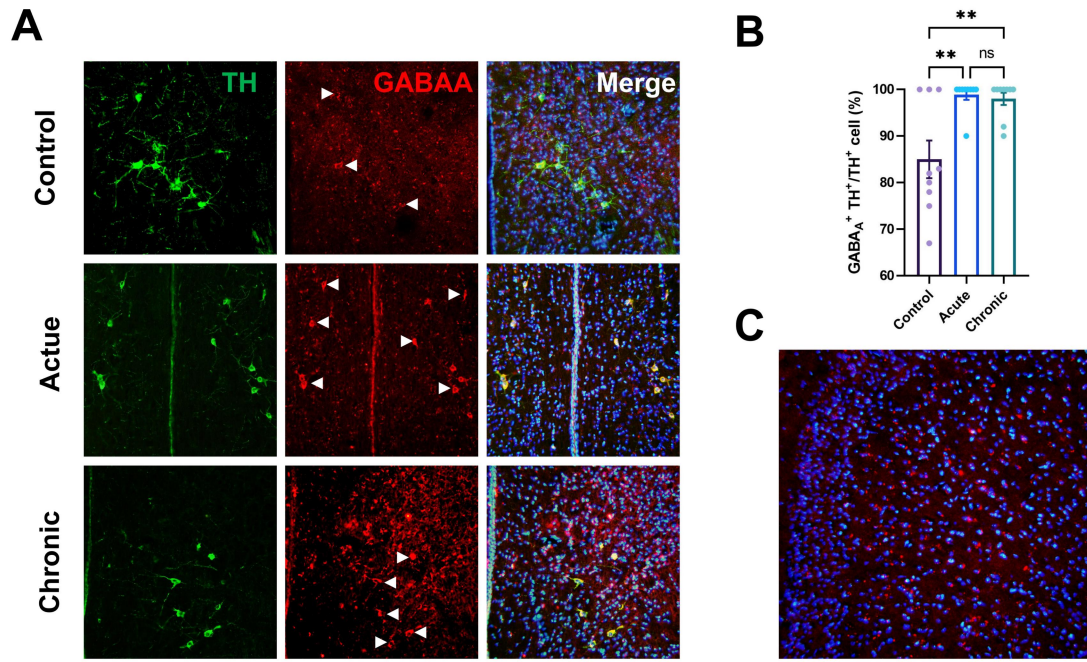

**Figure S1.** Effect of GTN intervention on the distribution of GABAA receptors in the A11 nucleus. (A) Co-localization of TH<sup>+</sup> (Dopaminergic neurons, green) neurons with GABAA receptor<sup>+</sup> (red) neurons in the A11 nucleus. (B) Proportion of GABAA<sup>+</sup> TH<sup>+</sup> neurons to total TH<sup>+</sup> neurons in the A11 nucleus. (C) GABAA<sup>+</sup> (red) neurons in mouse cerebral cortex. Significance was assessed by one-way ANOVA with post hoc comparison between groups (\*\*P < 0.01). All data are presented as the mean ± S.E.M.
